# Supplementary material for: Exploring the feasibility of liquid fuel synthesis from CO2 under cold plasma discharge: role of plasma discharge in binary metal oxide surface modification
Source: Royal Society of Chemistry journal article supplement (doi:10.1039/d1ra04852j), 2021-01-01
Supplement: d1ra04852j1.pdf [file d1ra04852j1.pdf]

Integral Counts: 105407

Base(4)

Cursor: 0.000 keV  
0 Counts

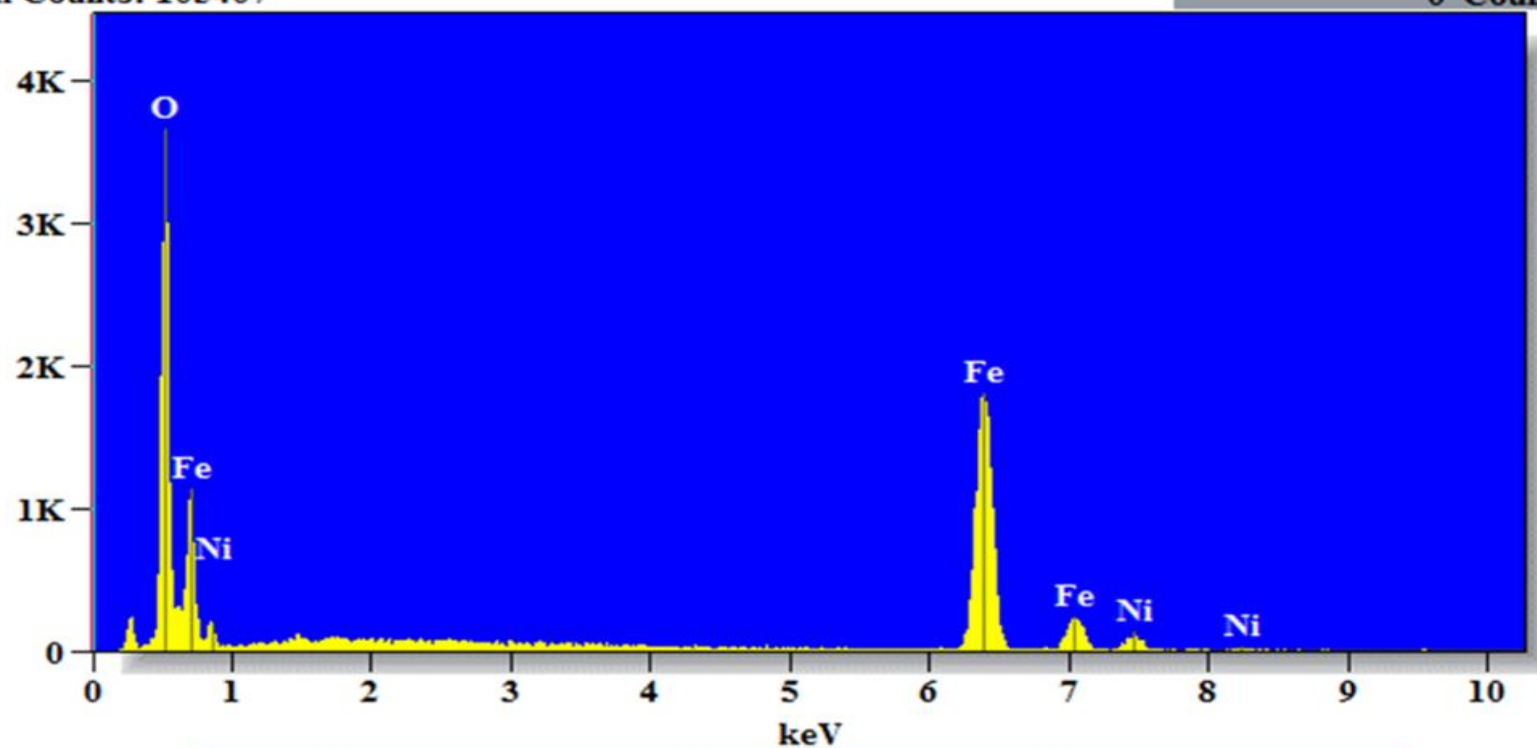

| Element | Net Counts | Int. Cps/nA | Weight % | Atom % |
|---------|------------|-------------|----------|--------|
| O       | 19080      | ---         | 34.22    | 64.58  |
| Fe      | 28336      | ---         | 60.57    | 32.74  |
| Fe      | 9804       | ---         | ---      | ---    |
| Ni      | 1645       | ---         | 5.21     | 2.68   |
| Ni      | 1335       | ---         | ---      | ---    |
| Total   |            |             | 100.00   | 100.00 |

Sup.Figure 1a Elemental composition for 5NF catalyst obtained using EDS

Full scale counts: 1727  
Integral Counts: 76042

Base(3)

Cursor: 0.000 keV  
0 Counts

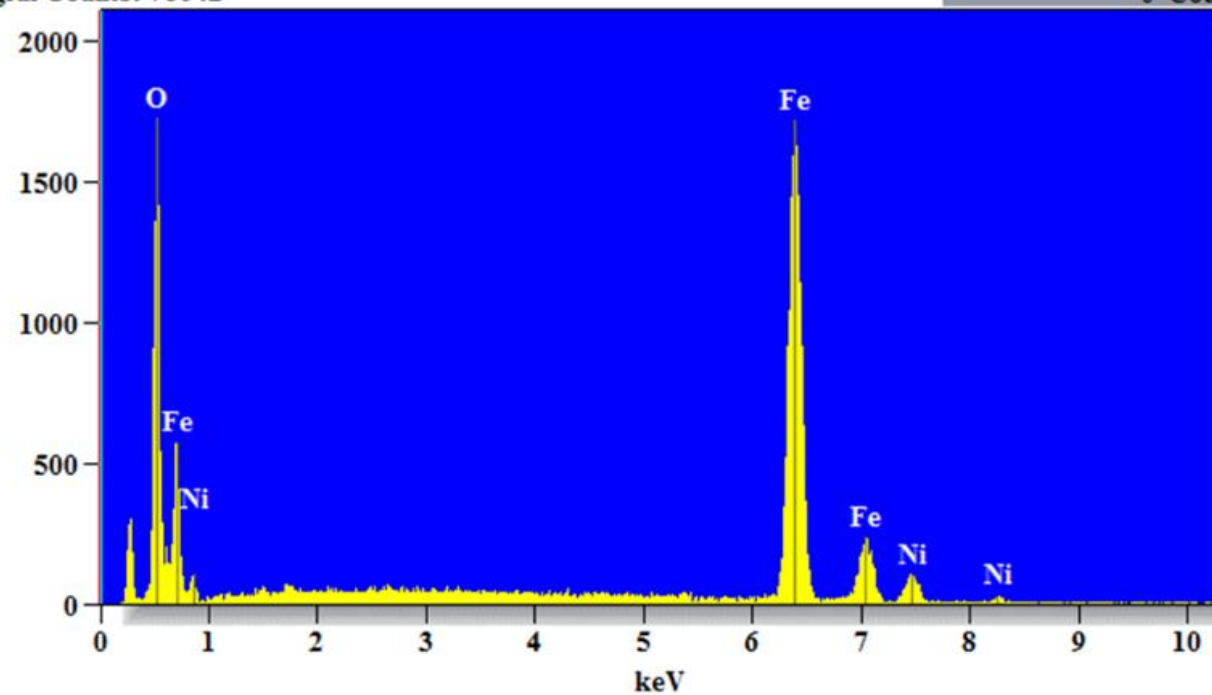

| <i>Element</i> | <i>Net<br/>Counts</i> | <i>Int.<br/>Cps/nA</i> | <i>Weight %</i> | <i>Atom %</i> |
|----------------|-----------------------|------------------------|-----------------|---------------|
| <i>O</i>       | 8940                  | ---                    | 22.39           | 49.08         |
| <i>Fe</i>      | 25985                 | ---                    | 67.31           | 45.84         |
| <i>Fe</i>      | 5170                  | ---                    | ---             | ---           |
| <i>Ni</i>      | 1545                  | ---                    | 10.3            | 5.08          |
| <i>Ni</i>      | 719                   | ---                    | ---             | ---           |
| <i>Total</i>   |                       |                        | 100.00          | 100.00        |

Sup.Figure 1b Elemental composition for 10NF catalyst obtained using EDS

Full scale counts: 2634  
Integral Counts: 74504

Base(11)

Cursor: 0.000 keV  
0 Counts

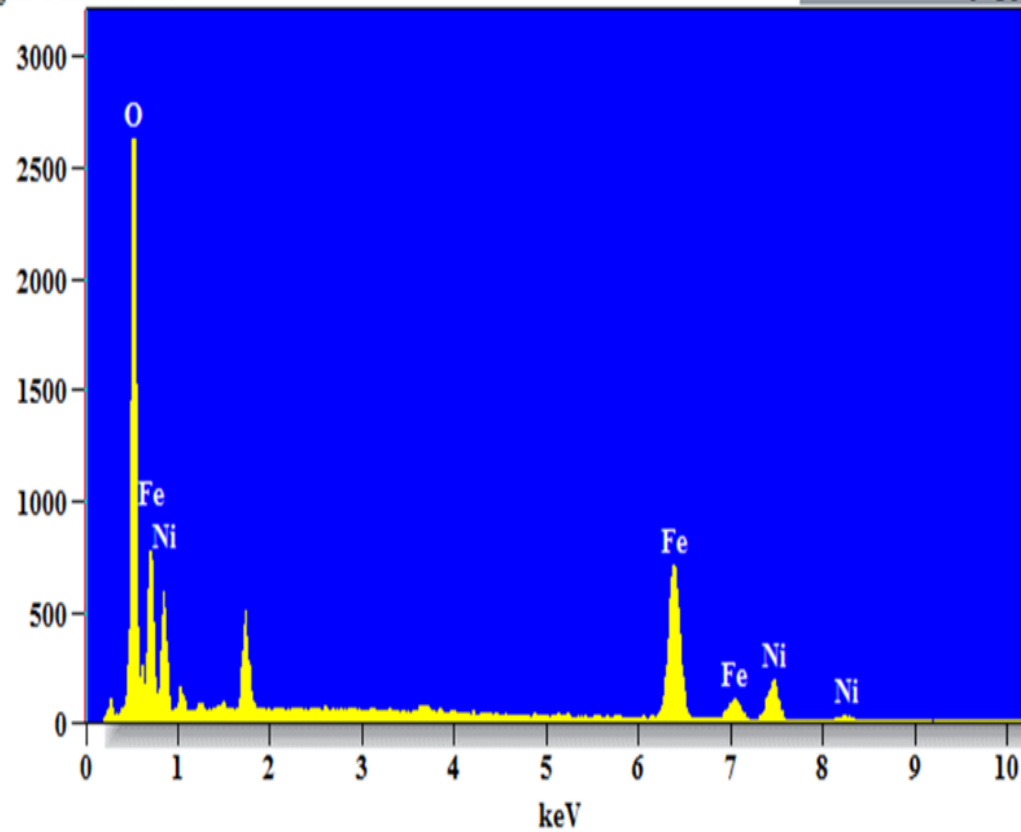

| <i>Element</i> | <i>Net<br/>Counts</i> | <i>Int.<br/>Cps/nA</i> | <i>Weight %</i> | <i>Atom %</i> |
|----------------|-----------------------|------------------------|-----------------|---------------|
| <i>O</i>       | 14123                 | ---                    | 26.67           | 56.30         |
| <i>Fe</i>      | 10899                 | ---                    | 58.03           | 36.27         |
| <i>Fe</i>      | 5439                  | ---                    | ---             | ---           |
| <i>Ni</i>      | 2732                  | ---                    | 15.3            | 7.43          |
| <i>Ni</i>      | 3089                  | ---                    | ---             | ---           |
| <i>Total</i>   |                       |                        | 100.00          | 100.00        |

Sup.Figure 1c Elemental composition for 15NF catalyst obtained using EDS

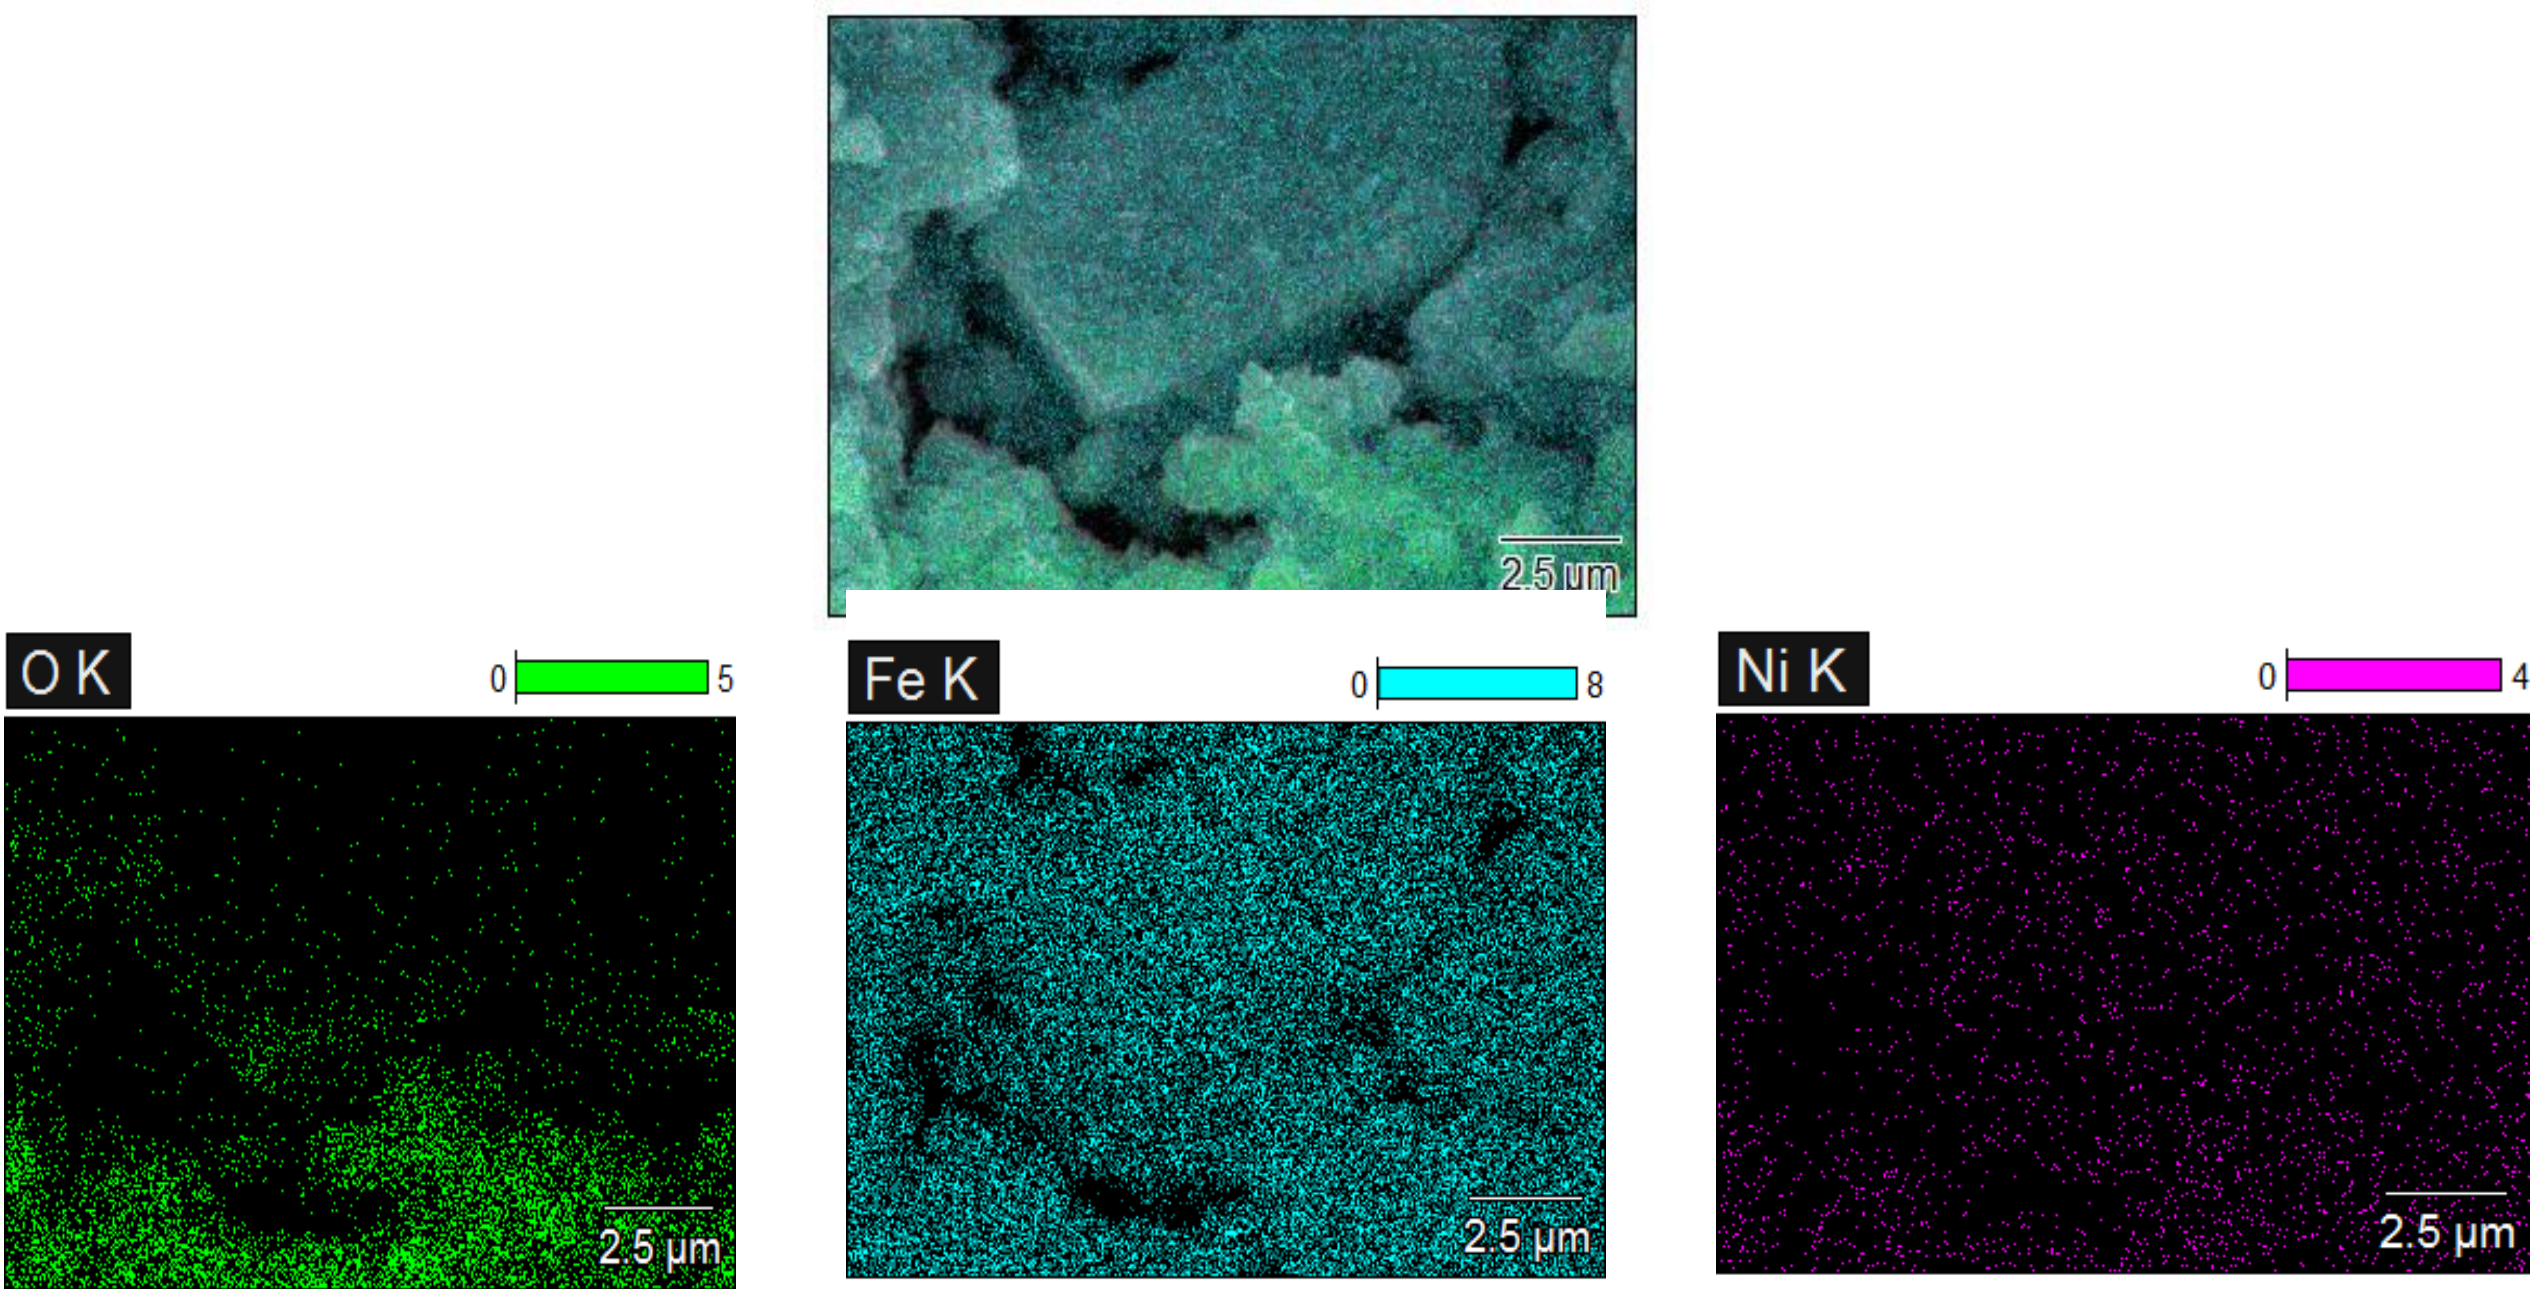

Sup.Figure 1d Elemental mapping for 10NF catalyst obtained using FESEM

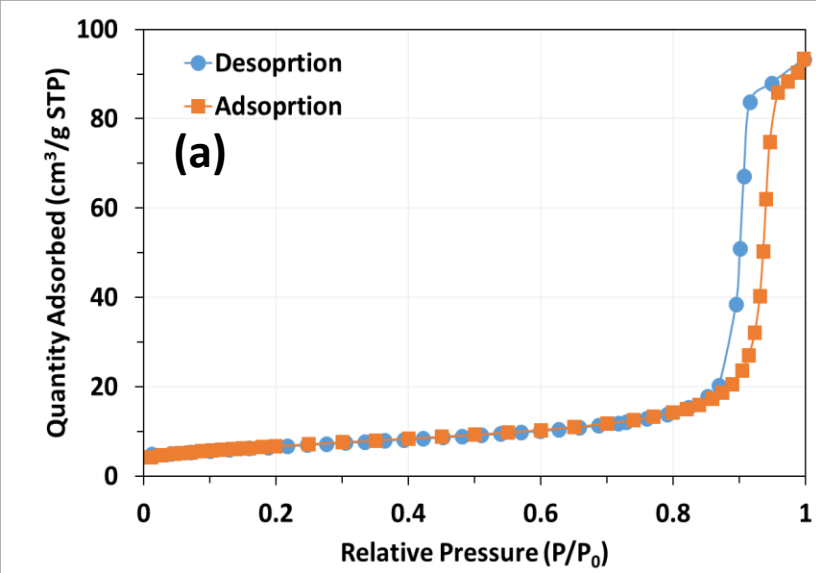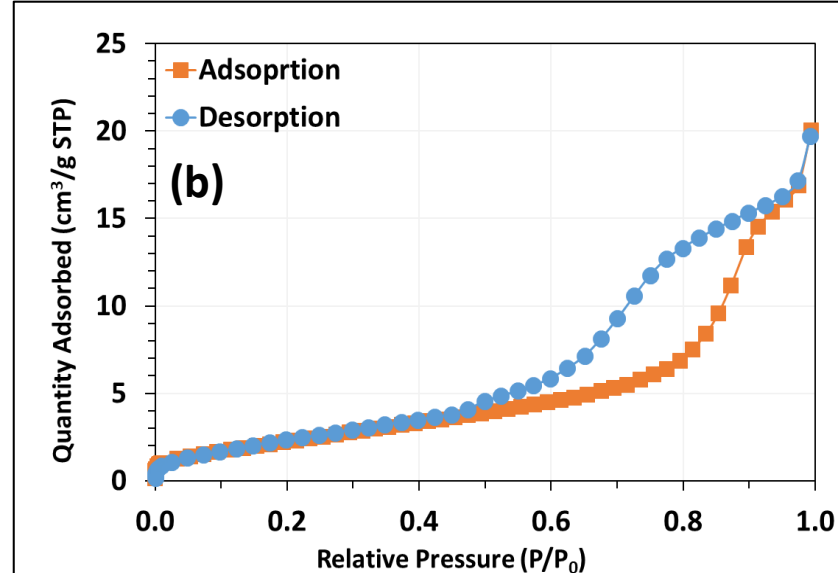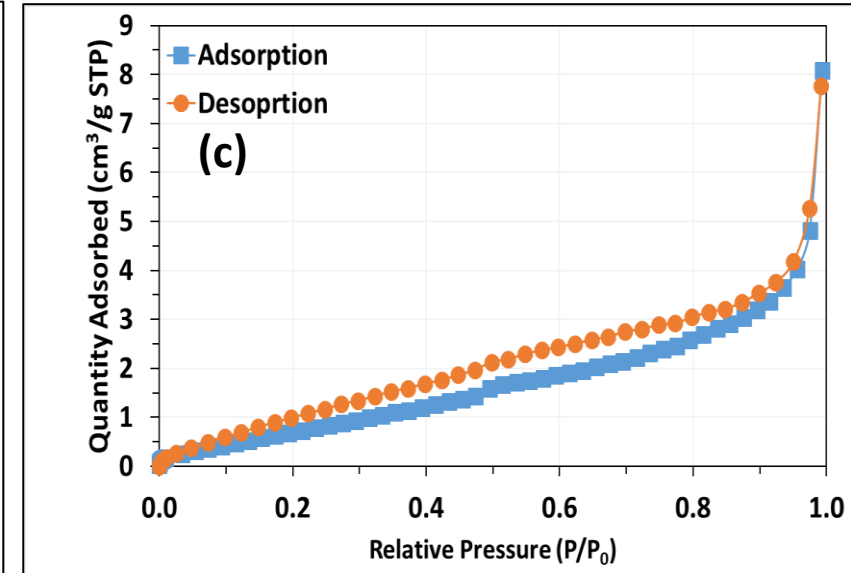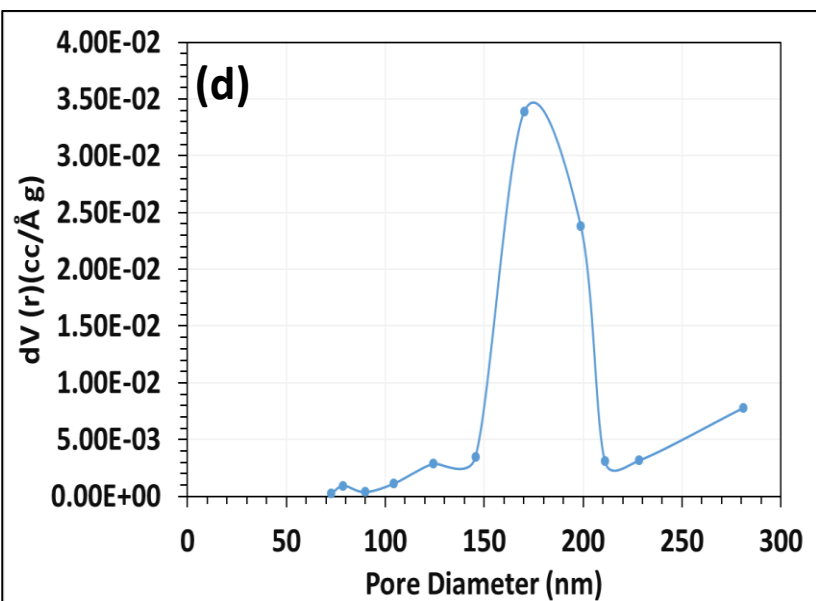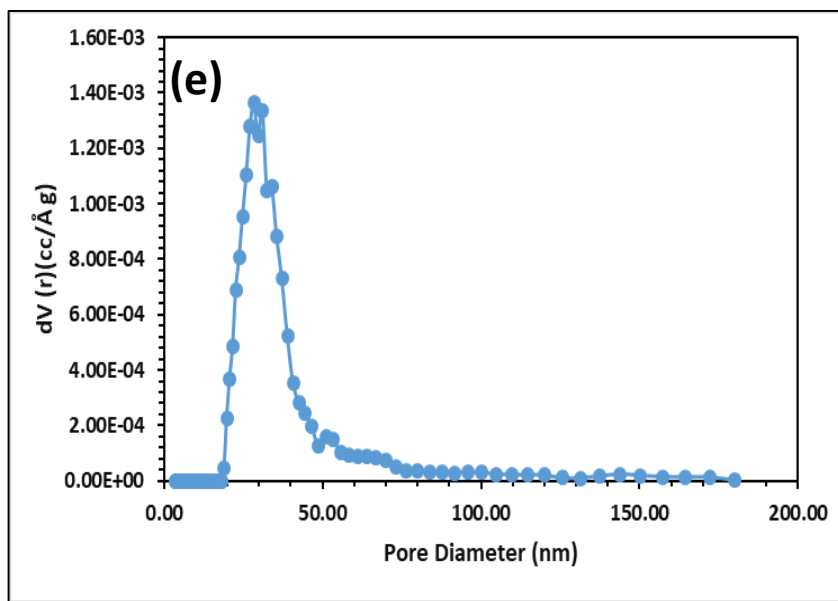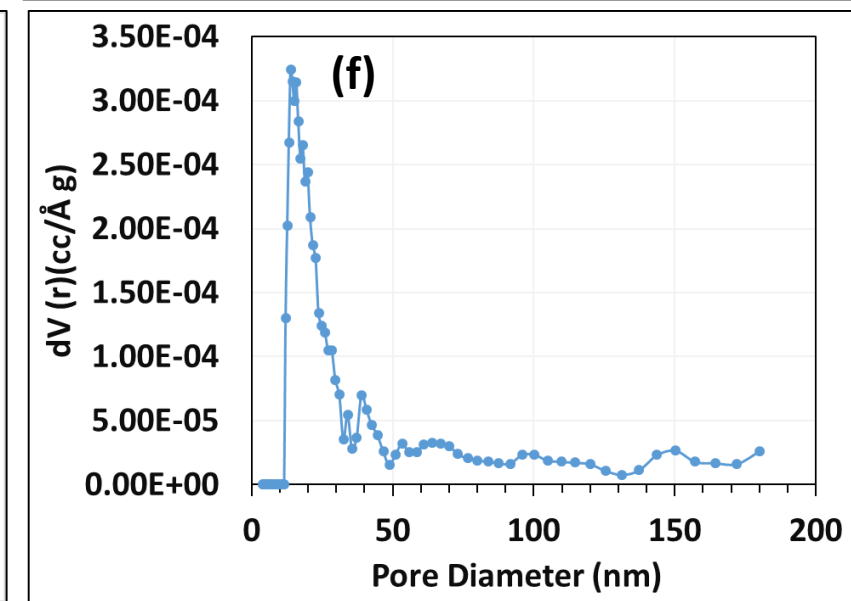

Sup. Figure 2 Adsorption-Desorption isotherm of catalysts (a) 5 NF, (b) 10 NF, (c) 15 NF, (d)  $dV(r)$  vs pore diameter for 5 NF, (e)  $dV(r)$  vs pore diameter for 10 NF, (f)  $dV(r)$  vs pore diameter for 15 NF.

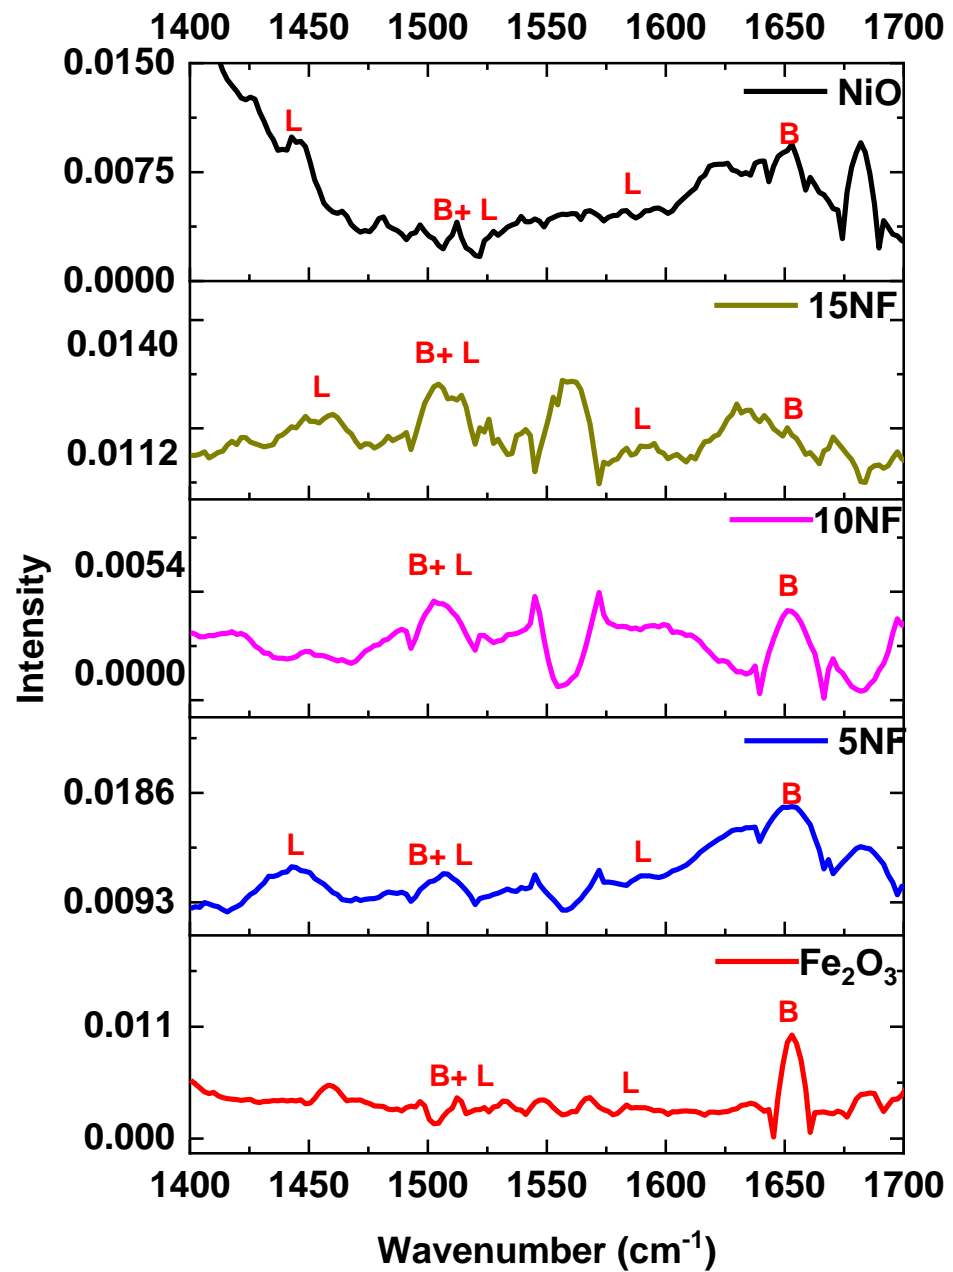

Sup.Figure 3 Pyridine adsorbed -FTIR spectra of prepared catalysts.

$$\text{CO}_2 \text{ conversion (\%)} = \frac{[\text{CO}_2(\text{in}) - \text{CO}_2(\text{out})]}{[\text{CO}_2(\text{in})]} \times 100$$

Sup. Equation 1

$$\text{CO selectivity (\%)} = \frac{[\text{CO}]}{[\text{CO}_2(\text{in}) - \text{CO}_2(\text{out})]} \times 100$$

Sup. Equation 2

$$\text{CH}_4 \text{ selectivity (\%)} = \frac{[\text{CH}_4]}{[\text{CO}_2(\text{in}) - \text{CO}_2(\text{out})]} \times 100$$

Sup. Equation 3

$$\text{CH}_3\text{OH selectivity of (\%)} = \frac{[\text{CH}_3\text{OH}]}{[\text{CO}_2(\text{in}) - \text{CO}_2(\text{out})]} \times 100$$

Sup. Equation 4

$$\text{Yield}(\text{CH}_3\text{OH}(\%), \text{CO}(\%), \text{CH}_4(\%)) = \frac{[(S_{\text{CH}_3\text{OH}}(\%), S_{\text{CO}}(\%), S_{\text{CH}_4}(\%)) \times X_{\text{CO}_2}(\%)]}{100}$$

Sup. Equation 5

$$\text{Specific input energy (SIE J/L)} = \frac{\text{Power injected into the reactor (W)}}{\text{Feed flow rate } \left(\frac{\text{L}}{\text{S}}\right)}$$

Sup. Equation 6

Where  $S_{\text{CH}_3\text{OH}}$  and  $X_{\text{CO}_2}$  are  $\text{CH}_3\text{OH}$  selectivity and  $\text{CO}_2$  conversion, respectively.



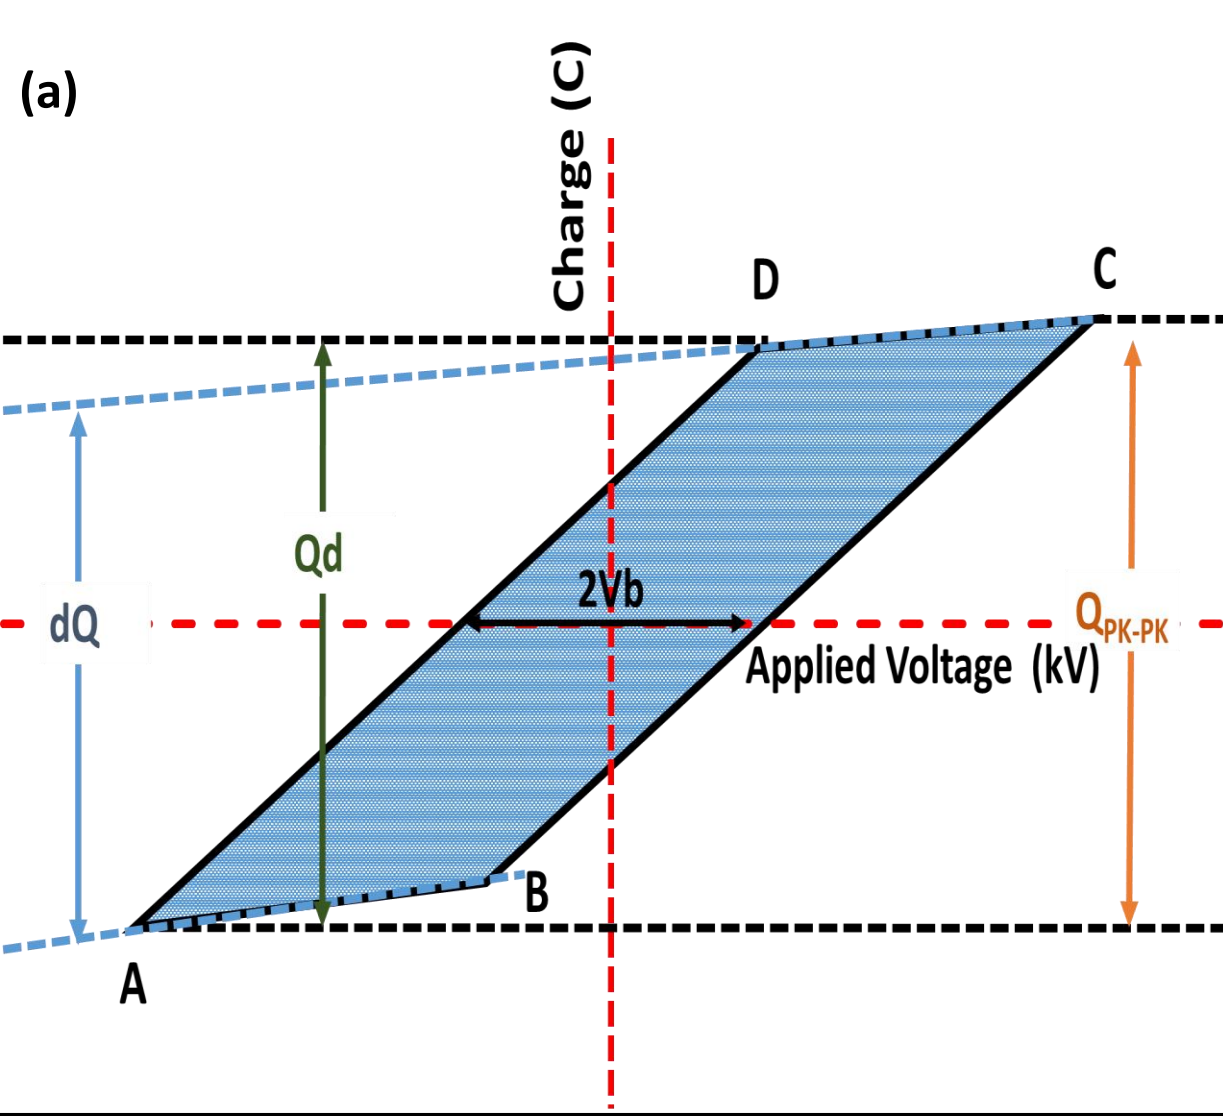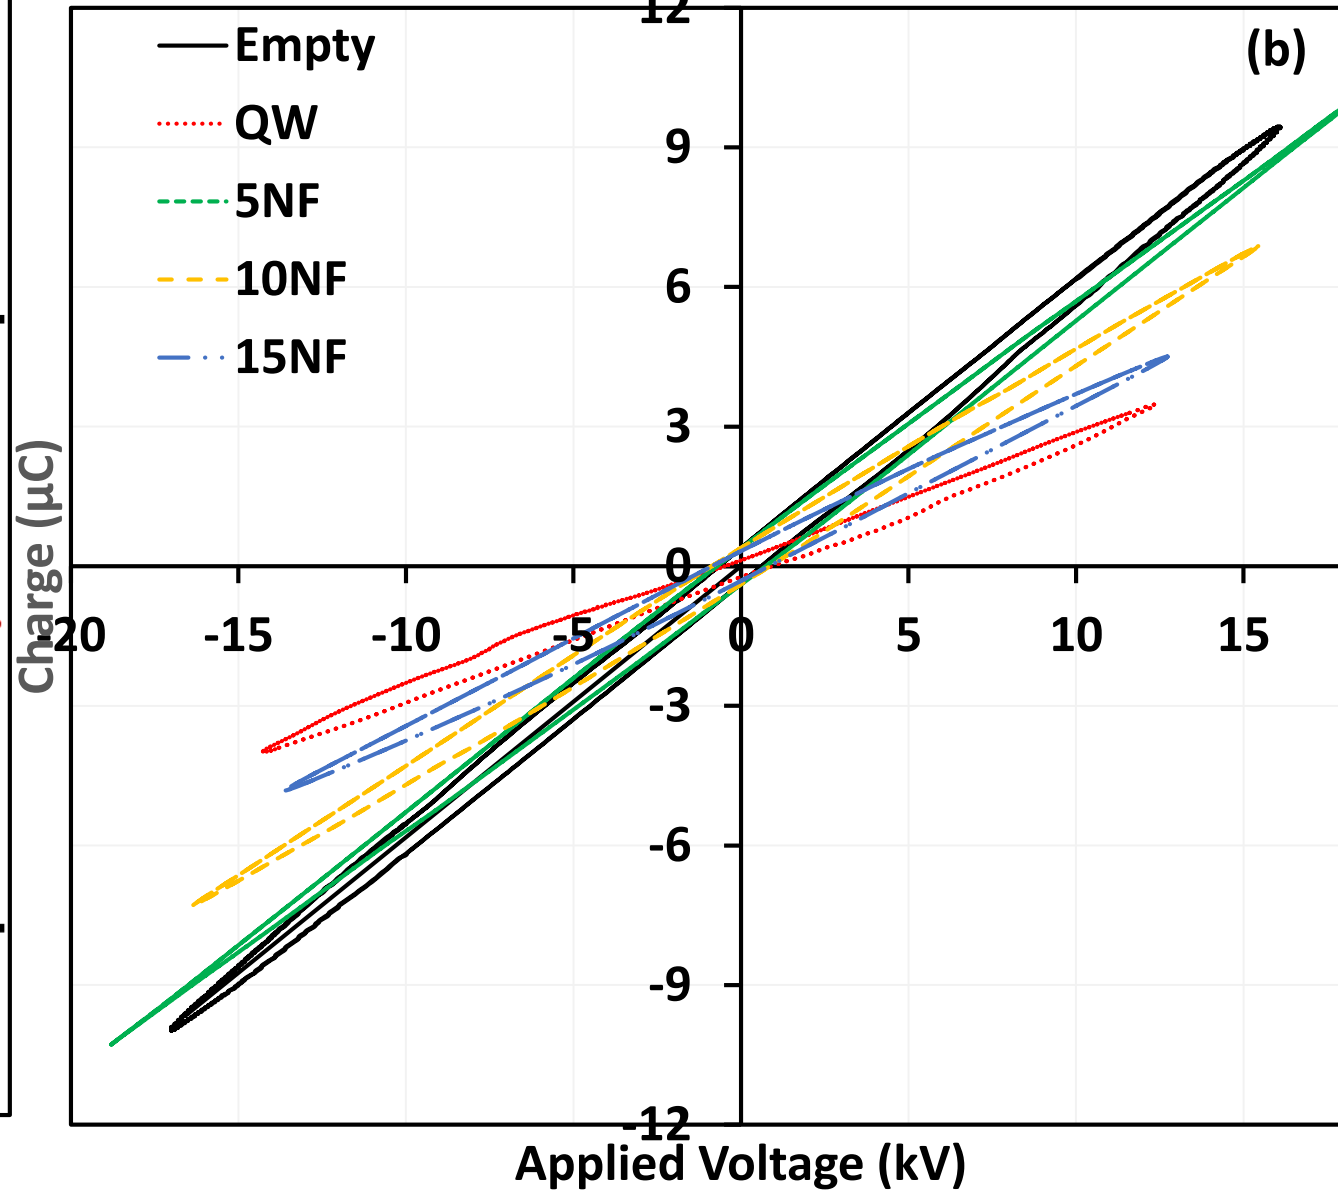

Sup. Figure 4 a) Typical schematic of Lissajous Figure, b) Discharge characteristics of reactor Lissajous figure at 14 kV for different packing materials (feed flow rate 100 ml/min,  $\text{CO}_2:\text{H}_2=1:3$ , frequency 50 Hz.)



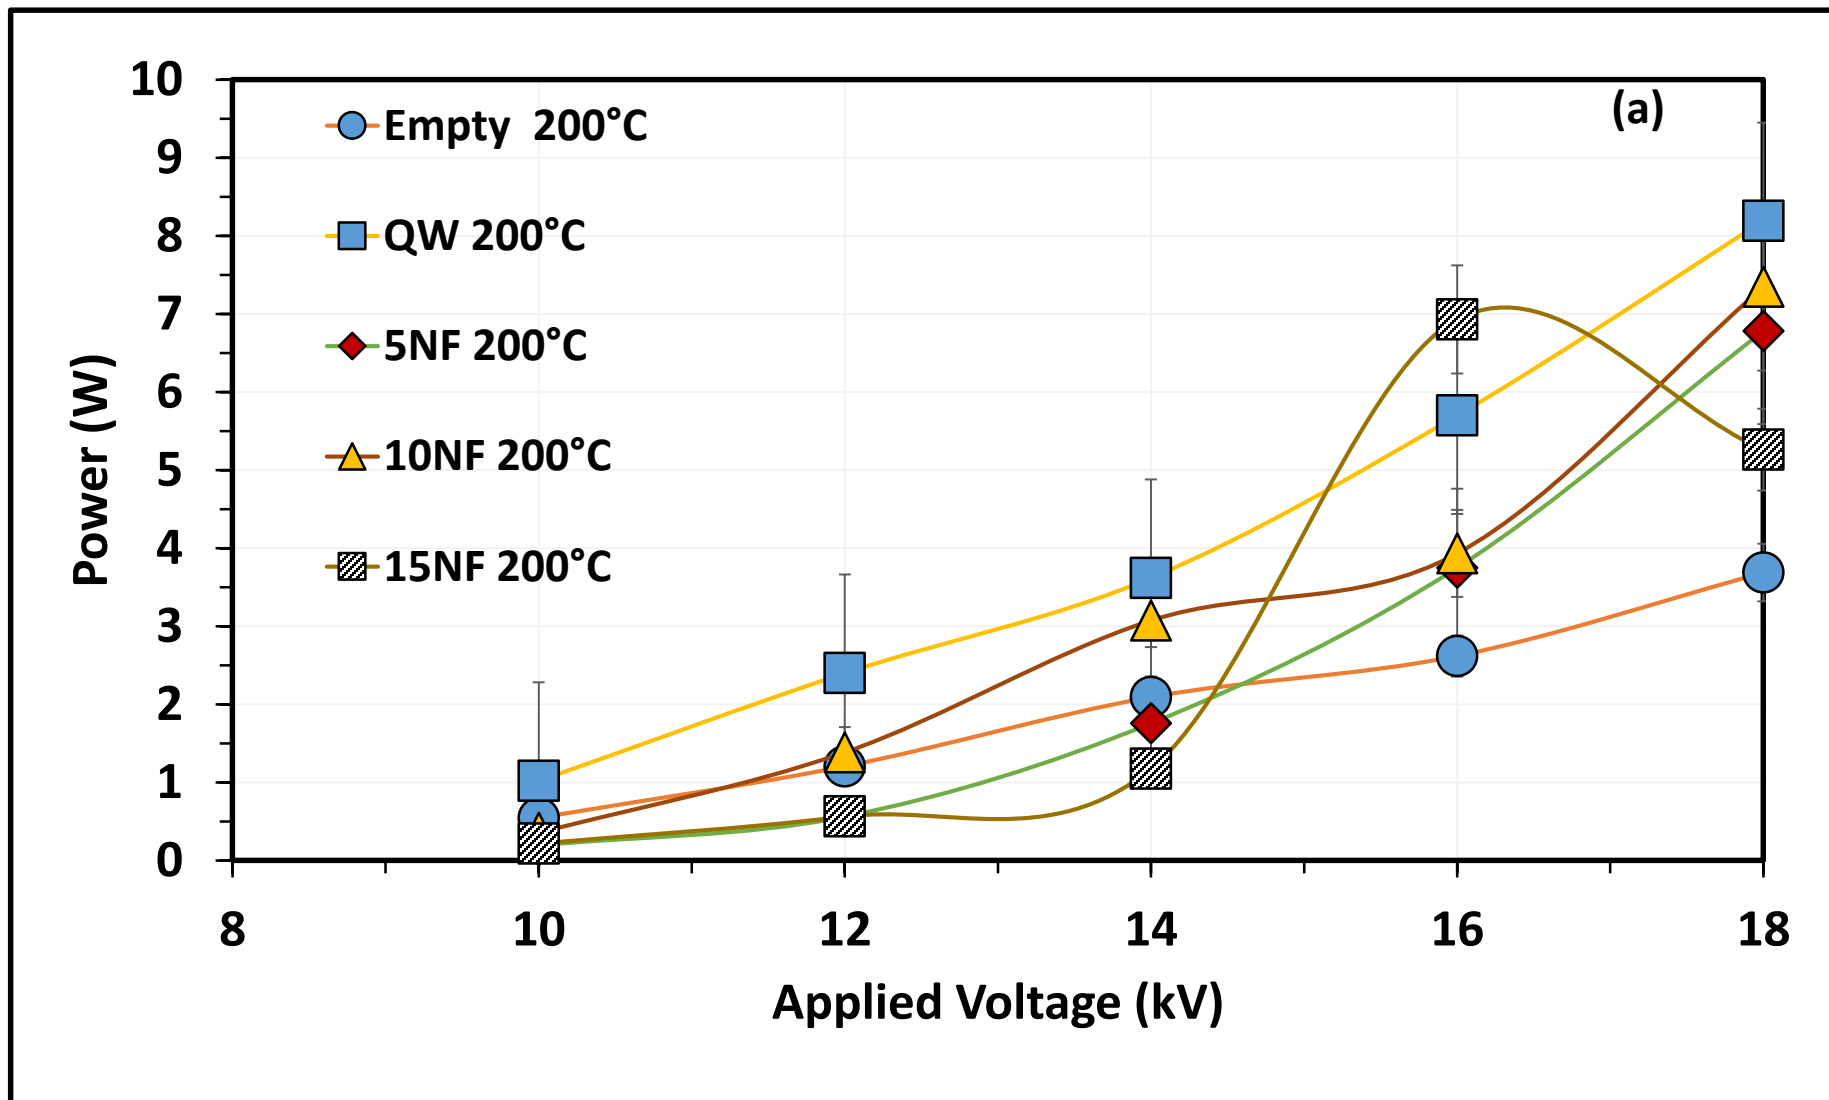

Sup.Figure 5 Discharge characteristics for various reactors: (a) impact of applied voltage on power injected into reactor ,(fee flow rate 100 ml/min, CO<sub>2</sub>:H<sub>2</sub>=1:3, frequency 50 hz.)

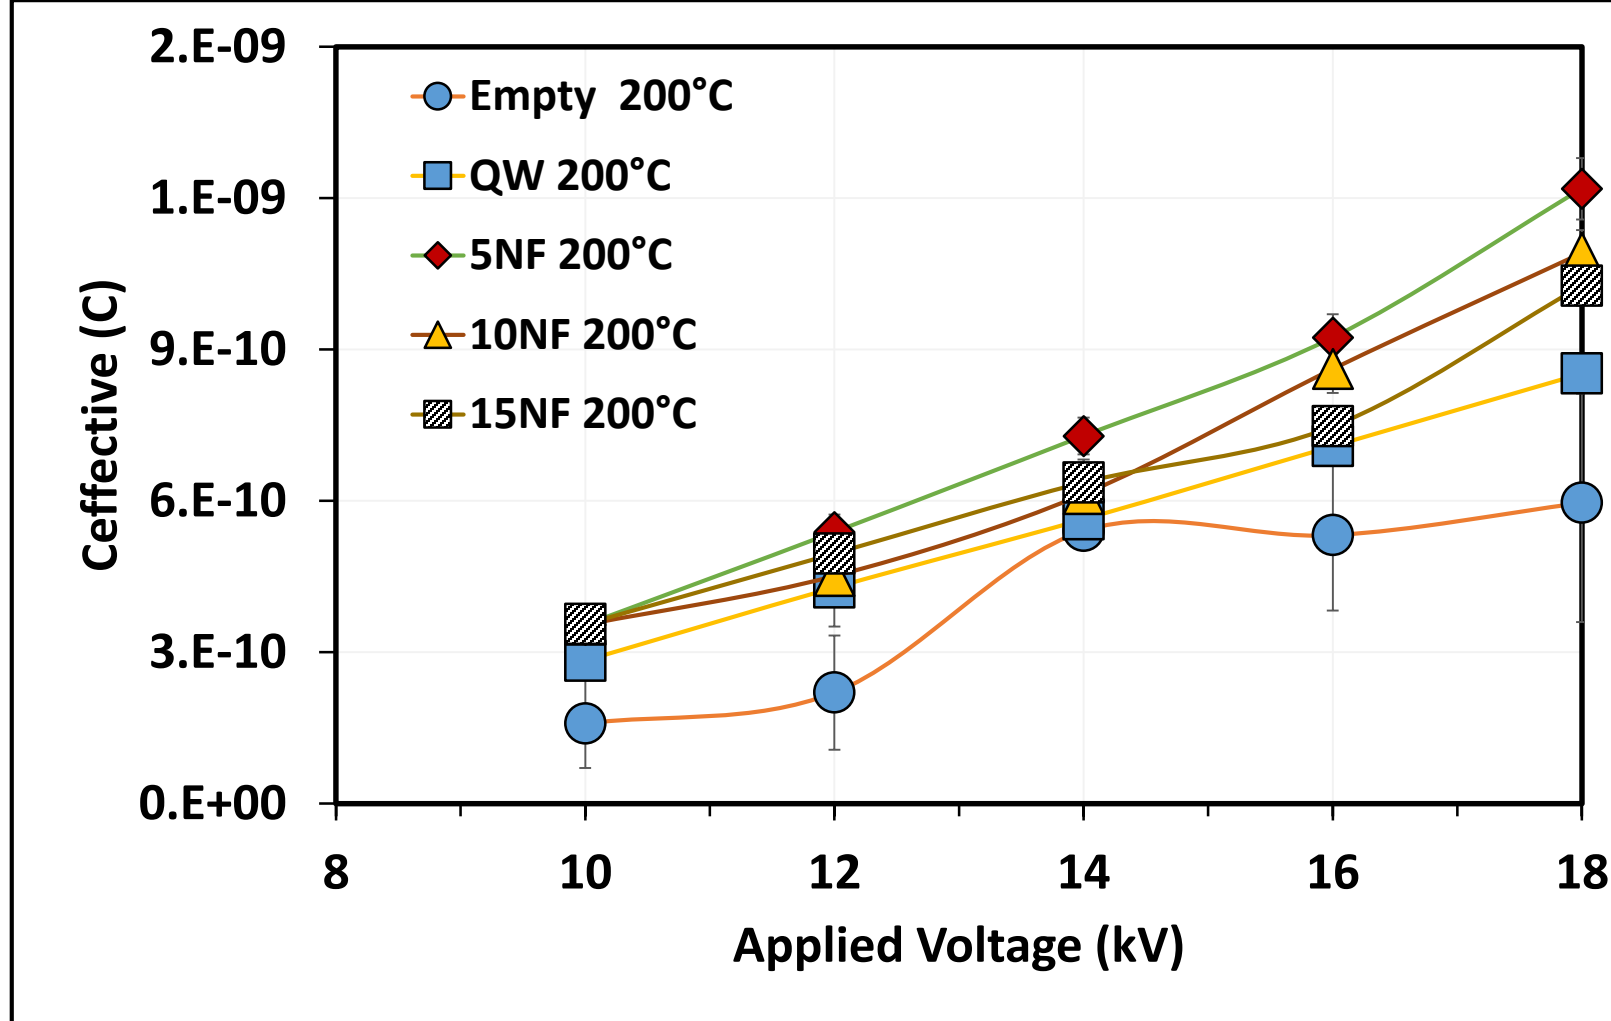

Sup.Figure 6 Discharge characteristics for various reactors: variation in effective capacitance with applied voltage, (feed flow rate 100 ml/min, CO<sub>2</sub>:H<sub>2</sub>=1:3, frequency 50 hz.)

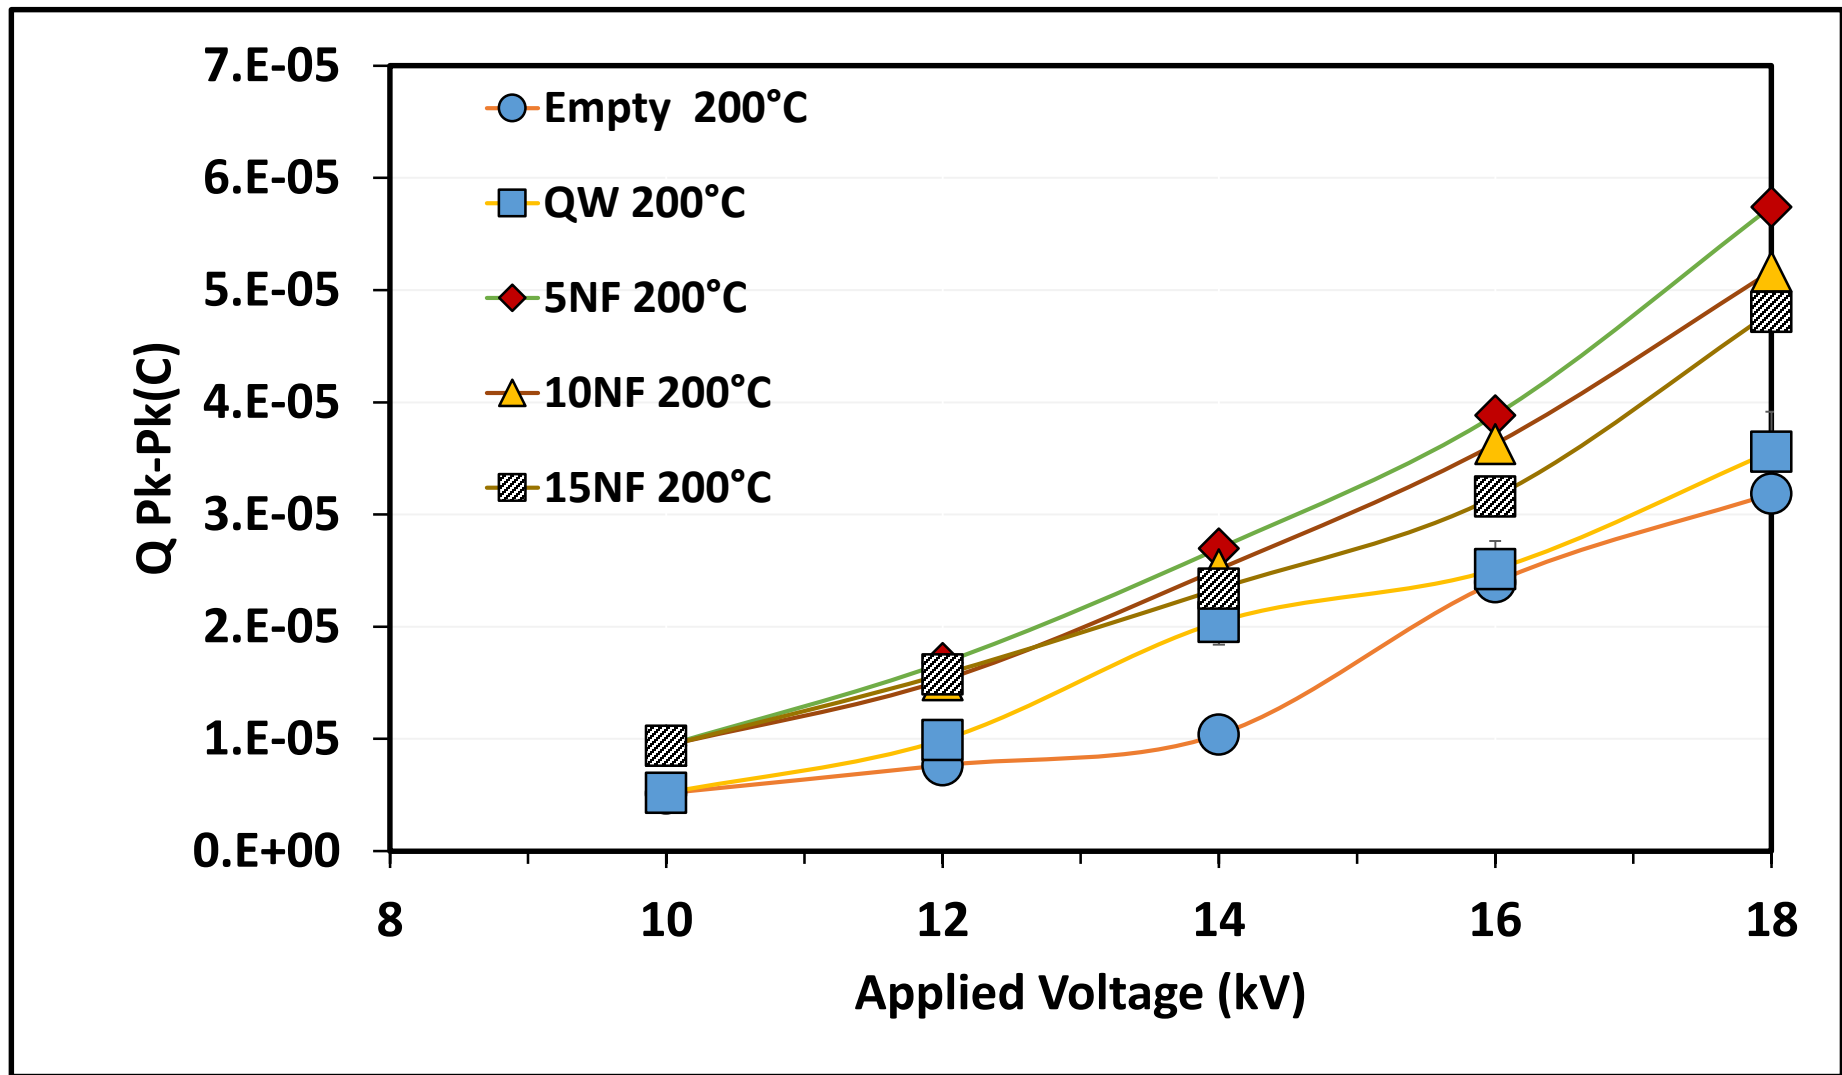

Sup.Figure 7 Discharge characteristics for various reactors: peak charge transfer as a function of applied voltage (feed flow rate 100 ml/min, CO<sub>2</sub>:H<sub>2</sub>=1:3, frequency 50 hz.)

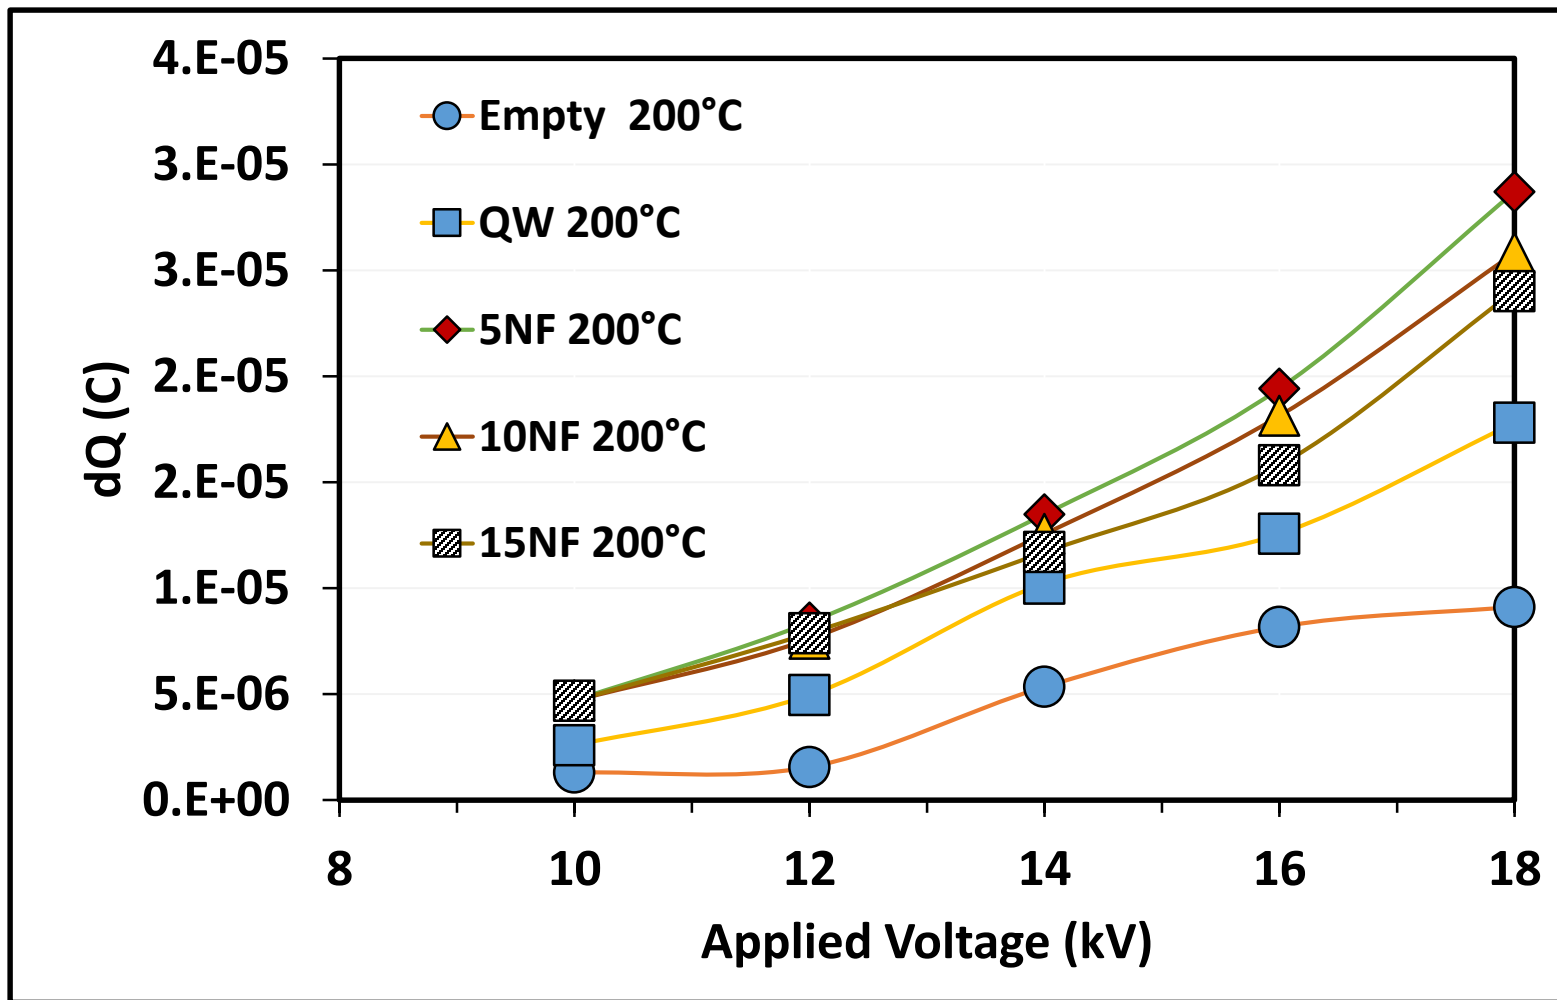

Sup.Figure 8 Discharge characteristics for various reactors: charge transfer per half cycle (feed flow rate 100 ml/min, CO<sub>2</sub>:H<sub>2</sub>=1:3, frequency 50 hz.)
